# Supplementary material for: A comparison of the prevalence of dry mouth and other symptoms using two different versions of the Edmonton Symptom Assessment System on an inpatient palliative care unit
Source: Springer Nature journal article supplement (doi:10.1186/s12904-024-01405-7), 2024-03-16
Supplement: MOESM1 [file 26868226]

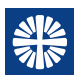

PATIENTS ID

Name:.....

Birth number:

|  |  |  |  |  |  |  |  |  |  |  |  |
|--|--|--|--|--|--|--|--|--|--|--|--|
|  |  |  |  |  |  |  |  |  |  |  |  |
|--|--|--|--|--|--|--|--|--|--|--|--|

### How are you today?

ESAS (Edmonton Symptom Assessment System)

Date.....

Time.....

Completed by:  Patient  Health Care Professional  Patient with assistance

#### Pain at rest

None 0 1 2 3 4 5 6 7 8 9 10 Worst Possible

#### Pain on movement

None 0 1 2 3 4 5 6 7 8 9 10 Worst Possible

#### Tiredness

None 0 1 2 3 4 5 6 7 8 9 10 Worst Possible

#### Nausea

None 0 1 2 3 4 5 6 7 8 9 10 Worst Possible

#### Shortness of breath

None 0 1 2 3 4 5 6 7 8 9 10 Worst Possible

#### Dry mouth

None 0 1 2 3 4 5 6 7 8 9 10 Worst Possible

#### Lack of appetite

None 0 1 2 3 4 5 6 7 8 9 10 Worst Possible

#### Constipation

None 0 1 2 3 4 5 6 7 8 9 10 Worst Possible

#### Sleep problems

None 0 1 2 3 4 5 6 7 8 9 10 Worst Possible

#### Anxious

None 0 1 2 3 4 5 6 7 8 9 10 Worst Possible

#### Depressed

None 0 1 2 3 4 5 6 7 8 9 10 Worst Possible

#### How do you feel overall today?

Best wellbeing 0 1 2 3 4 5 6 7 8 9 10 Worst Possible



**Lovisenberg Diakonale Sykehus**

*Pionér i kompetanse og omsorg*
